# Supplementary material for: Discovery of a novel powdery mildew (Blumeria graminis) resistance locus in rye (Secale cereale L.)
Source: PubMed Central journal article supplement (PMC8630102; doi:10.1038/s41598-021-02488-5), 2021-11-29

All  
(n = 180)

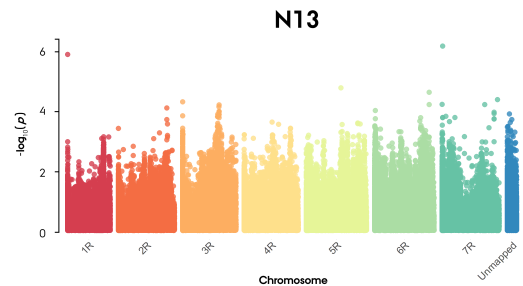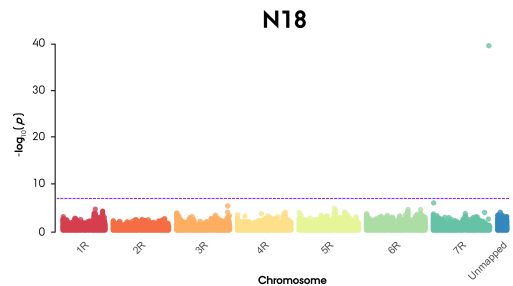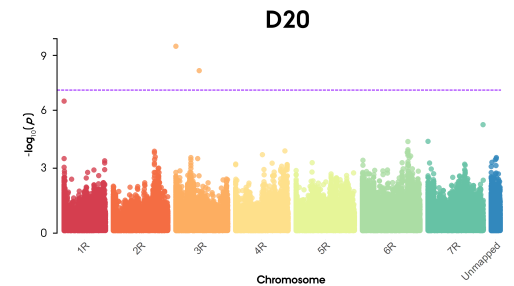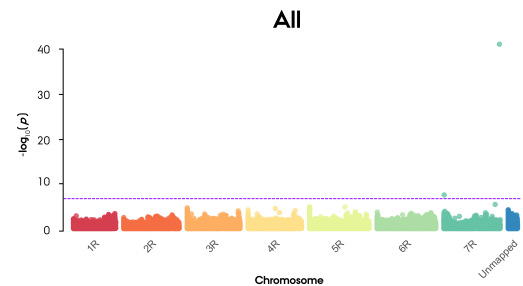

NRG  
(n = 88)

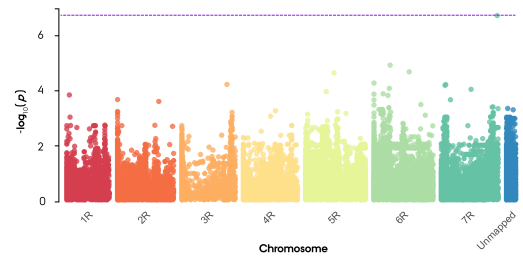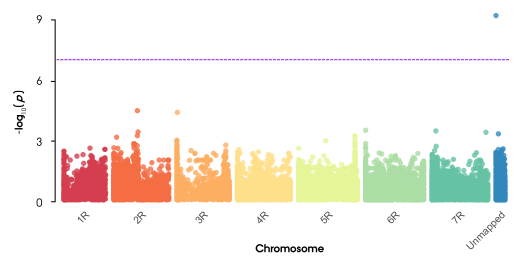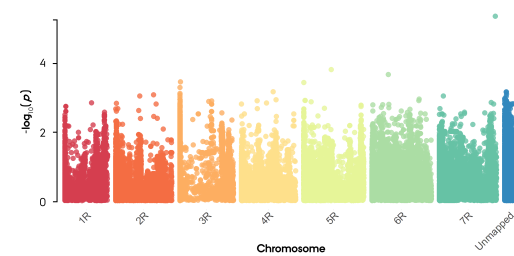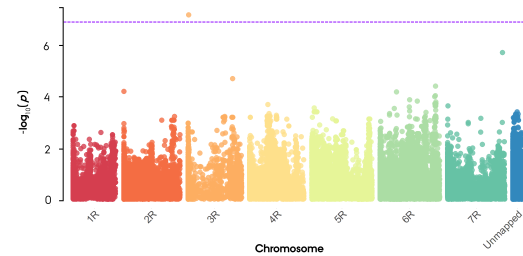

R  
(n = 92)

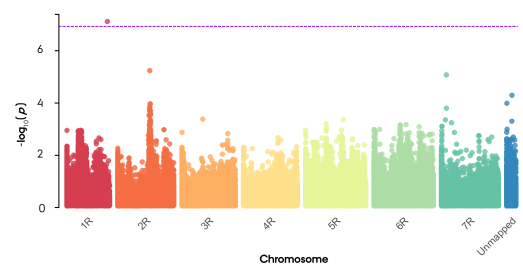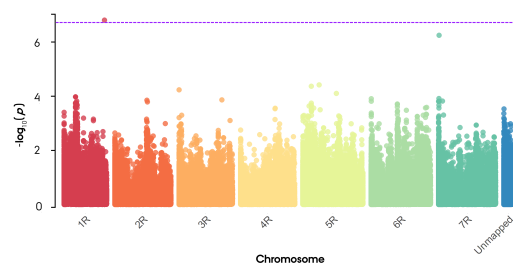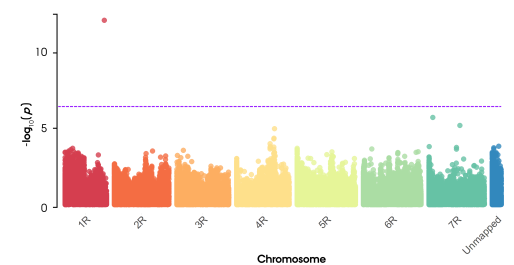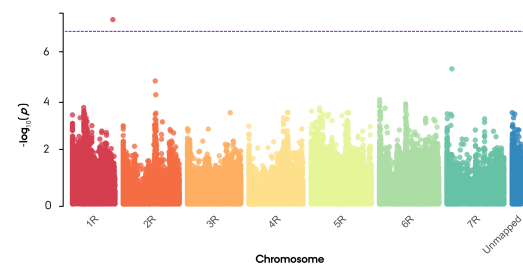

Supplement: 41598_2021_2488_MOESM14_ESM.pdf [file 41598_2021_2488_MOESM14_ESM.pdf]
